# Supplementary material
Source: PubMed Central journal article supplement (PMC7965561)
Supplement: 2384_tables.pdf [file 2384_tables.pdf]

**On-line Table 1: Clinical presentation and outcomes**

| Patient No. | Age (yr) | Sex | Presenting Symptoms                                                              | Symptom Duration | Ultimate Clinical Outcome                                        |
|-------------|----------|-----|----------------------------------------------------------------------------------|------------------|------------------------------------------------------------------|
| 1           | 61       | M   | Positional headache, chronic neck and back pain                                  | 24 Months        | Marked improvement                                               |
| 2           | 41       | M   | Burning occipital positional headache                                            | 8 Months         | Initial improvement, represented with increased CSF pressure     |
| 3           | 40       | F   | Positional headache and interscapular/neck pain, sudden onset while bending over | 1 Month          | Asymptomatic                                                     |
| 4           | 53       | F   | Chest and arm burning pain, lower extremity weakness                             | 9 Months         | Significantly decreased pain, increased lower extremity strength |
| 5           | 36       | F   | Daily frontotemporal headaches, bilateral shoulder pain                          | 24 Months        | Marked improvement                                               |
| 6           | 60       | M   | Severe positional headaches, neck pain, nausea, vertigo, tinnitus, photophobia   | 18 Days          | Asymptomatic                                                     |
| 7           | 59       | F   | Positional headaches                                                             | 1 Month          | Marked improvement                                               |
| 8           | 53       | F   | Positional headaches, tinnitus, neck pain                                        | 24 Months        | Marked improvement of headaches and pain, persistent tinnitus    |

**On-line Table 2: Imaging findings and treatment details**

| Patient No. | Pretreatment Imaging Findings                                                                               | Posttreatment Imaging Findings                                 | Imaging to Treatment (days) | No. of Sites Patched at Initial Session | Total No. of Sessions | Treatment to Repeat MR Imaging (days) |
|-------------|-------------------------------------------------------------------------------------------------------------|----------------------------------------------------------------|-----------------------------|-----------------------------------------|-----------------------|---------------------------------------|
| 1           | Dural enhancement, spinal extradural fluid collection                                                       | Resolved                                                       | 140                         | 4                                       | 6                     | 490                                   |
| 2           | Tonsillar ectopia, effacement of suprasellar cistern                                                        | Resolved                                                       | 10                          | 3                                       | 1                     | 12                                    |
| 3           | Dural enhancement, tonsillar ectopia, effacement of suprasellar cistern, spinal extradural fluid collection | Resolved brain findings, near-resolution of spinal collection  | 20                          | 5                                       | 1                     | 15                                    |
| 4           | Dural enhancement, tonsillar ectopia, midline sag, syrinx                                                   | Resolved brain findings, near-resolution of syringohydromyelia | 13                          | 7                                       | 3                     | 268                                   |
| 5           | Dural enhancement, subdural collections                                                                     | Resolved                                                       | 56                          | 2                                       | 3                     | 91                                    |
| 6           | Dural enhancement, tonsillar ectopia, subdural collections, spinal subdural fluid collection                | Resolved                                                       | 4                           | 1                                       | 4                     | 46                                    |
| 7           | Dural enhancement                                                                                           | Resolved                                                       | 17                          | 8                                       | 4                     | 7                                     |
| 8           | Dural enhancement                                                                                           | Resolved                                                       | 50                          | 10                                      | 3                     | 50                                    |
